# Supplementary material
Source: publisher site journal article supplement (https://www.dovepress.com/get_supplementary_file.php?f=325853.docx)
Supplement: Supplementary file 1 [file get_supplementary_file.php]

**Supplementary methods**

**Methods**

**2.2 Chest CT and artificial intelligence (AI)-based quantification of CT images**

Chest CT was performed in these subjects using a 126-slice CT scanner (Ingenuity Core 128, Philips) with standard imaging protocols as follows: CT tube voltage 120KV and tube current 80–250 mA, CT rotation time 0.3–0.75 s, CT detector collimation 64 × 0.6 mm, and image matrix 512 × 512, pitch 1.5, and section thickness 1.0 mm. Radiological findings, including ground-glass opacity (GGO), fibrous stripes, thickening of the adjacent pleura, bronchovesicular bundle distortion, and small pleural effusion, were collected and estimated by two experienced imaging specialists.

GGO was defined as a hazy area of increased attenuation without obscuring the underlying vasculature22. Fibrous stripes were defined as linear opacities with fine fibrosis and were usually associated with a distortion of the lung architecture22. Thickening of the adjacent pleura was defined as thickening of the adjacent fissural or peripheral pleura23. Bronchovascular bundle distortion/architectural distortion was defined as a distorted appearance of lung anatomy characterised by abnormal displacement of bronchi, vessels, fissures, or septa caused by diffuse or localised lung disease, particularly interstitial fibrosis22.

In addition, an artificial intelligence (AI)-based quantitative evaluation system (YITU Healthcare Technology, China) was used to calculate the volume of pneumonia lesions by analysing the CT values. This AI system was developed and validated in patients with COVID-19 and showed preferable pneumonia lesion segmentation24. In brief, lung segmentation using a deep learning-based approach allows a machine to be fed raw CT scan data and automatically discover the location and outline the region-of-interest (ROI) based on the density in each CT image. The proportion of ROIs was calculated per the above-mentioned results. By thresholding CT values in the pneumonia lesions, two quantitative features were computed, that is, the percentages of GGO volume with ranges of ≥-700 Hounsfield units (HU) and <-500 HU, and consolidation with ≥-200 HU and <60 HU. AI-derived CT features corresponded to the percentages of GGO volume (PGV), consolidation volume (PCV), and both (equal to 100 × lesion volume/bilateral lung volume [PLV]).

**2.4 Plasma collection and metabolite extraction**

Peripheral venous blood (10 mL) was collected into heparin sodium anticoagulant tubes and centrifuged at 600 g (rcf) for 10 min at 4°C to obtain plasma. All plasma samples were stored at −80°C. The plasma samples were thawed at 4 °C and vortexed for 30 s. Methanol (300 μL, precooled at -20°C) was added to 100 μL of sample/reagent blank (pure water), vortexed for 1 min and extracted at -20 °C. After 20 min, the mixture was vortexed for 1 min and centrifuged at 9391 g (rcf) for 10 min at 4 °C. The supernatant (260 μL) was transferred to a new centrifuge tube and dried under a stream of nitrogen. The dried contents were reconstituted in 100 μL ultrapure water, vortexed for 1 min, and centrifuged at 9391 g (rcf) for 10 min at 4 °C. Afterwards, all supernatants were collected for LC-MS analysis. The pooled quality control samples, which were prepared by mixing all of the studied samples were used to monitor and evaluate the precision and stability of LC-MS analysis in our presented study.

**Table S1. The significant differential metabolites in RMs versus HCs and RCs versus HCs.**

| **Retention time (Rt, min)** | **Observed M/Z(Da)** | **Adduct type** | **Metabolites** | **RM/HC** | | | | **RC/HC** | | | |
| --- | --- | --- | --- | --- | --- | --- | --- | --- | --- | --- | --- |
| **Fold Change** | ***P*-value** | **FDR** | **VIP** | **Fold Change** | ***P*-value** | **FDR** | **VIP** |
| 0.825 | 175.11911 | [M+H]+ | Arginine | 1.10 | 0.799 | 0.931 | 0.270 | 1.30 | 0.002 | 0.054 | 1.43 |
| 0.827 | 130.05 | [M+H]+ | Pyroglutamic acid | 1.00 | 0.860 | 0.951 | 0.080 | 1.20 | 0.022 | 0.141 | 1.06 |
| 0.83 | 106.05023 | [M+H]+ | Serine | 1.10 | 0.304 | 0.668 | 0.440 | 1.30 | 0.011 | 0.103 | 1.12 |
| 0.83 | 147.07629 | [M+H]+ | Glutamine | 1.00 | 0.982 | 0.988 | 0.110 | 1.30 | 0.016 | 0.123 | 1.13 |
| 0.836 | 126.02204 | [M+H]+ | Taurine | 0.30 | 0.010 | 0.167 | 2.750 | 0.50 | 0.003 | 0.056 | 2.12 |
| 0.87 | 104.1074 | [M]+ | Choline | 1.00 | 0.723 | 0.931 | 0.130 | 1.40 | 0.002 | 0.054 | 1.52 |
| 1.193 | 150.05815 | [M+H]+ | Methionine | 0.80 | 0.002 | 0.105 | 1.370 | 0.90 | 0.266 | 0.513 | 0.50 |
| 1.872 | 137.04556 | [M+H]+ | Hypoxanthine | 0.20 | 0.000 | 0.038 | 2.220 | 0.30 | 0.012 | 0.104 | 1.88 |
| 2.03 | 330.06018 | [M+H]+ | Cyclic AMP | 0.80 | 0.009 | 0.167 | 1.290 | 0.80 | 0.004 | 0.056 | 1.21 |
| 2.801 | 232.15463 | [M+H]+ | Butyrylcarnitine | 0.60 | 0.001 | 0.046 | 1.820 | 0.90 | 0.855 | 0.931 | 0.57 |
| 3.135 | 166.08623 | [M+H]+ | Phenylalanine | 0.80 | 0.009 | 0.167 | 1.120 | 0.90 | 0.827 | 0.909 | 0.39 |
| 3.712 | 291.09787 | [M+H]+ | Indole-acetyl-aspartic acid | 0.70 | 0.065 | 0.312 | 1.070 | 0.60 | 0.019 | 0.123 | 1.55 |
| 4.095 | 146.11778 | [M+H]+ | 3-Amino-5-methylhexanoic acid | 1.10 | 0.269 | 0.637 | 0.580 | 1.40 | 0.008 | 0.083 | 1.29 |
| 4.7 | 246.17001 | [M+H]+ | Valerylcarnitine | 0.80 | 0.012 | 0.167 | 1.060 | 1.10 | 0.208 | 0.454 | 0.50 |
| 6.448 | 377.14517 | [M+H]+ | Riboflavin | 1.10 | 0.220 | 0.588 | 0.520 | 0.70 | 0.001 | 0.033 | 1.60 |
| 7.239 | 132.08096 | [M+H]+ | 2-Methylindole | 0.90 | 0.127 | 0.444 | 0.480 | 0.70 | 0.002 | 0.054 | 1.46 |
| 7.407 | 206.08131 | [M+H]+ | Methoxyindoleacetic acid (MIAA) | 0.80 | 0.016 | 0.170 | 0.820 | 0.70 | 0.017 | 0.123 | 1.47 |
| 7.511 | 175.06325 | [M+H]+ | Ribitol | 0.90 | 0.353 | 0.714 | 0.260 | 1.40 | 0.001 | 0.047 | 1.65 |
| 7.61 | 288.21667 | [M+H]+ | Carnitine C8:0 | 0.80 | 0.543 | 0.823 | 0.690 | 1.40 | 0.025 | 0.149 | 1.25 |
| 8.017 | 185.0446 | [M+H]+ | 3,4-Dihydroxymandelic acid | 1.30 | 0.038 | 0.223 | 0.870 | 1.50 | 0.043 | 0.178 | 1.24 |
| 9.119 | 363.21658 | [M+H]+ | Hydrocortisone | 0.90 | 0.211 | 0.580 | 0.810 | 0.80 | 0.018 | 0.123 | 1.15 |
| 9.382 | 192.13799 | [M+H]+ | Diethylbenzeneacetamide (DEET) | 0.80 | 0.023 | 0.189 | 0.970 | 0.80 | 0.007 | 0.082 | 1.22 |
| 9.684 | 349.05795 | [M+H]+ | Inosine-5-monophosphate (IMP) | 3.20 | 0.001 | 0.050 | 2.310 | 2.40 | 0.047 | 0.180 | 1.95 |
| 9.708 | 342.26385 | [M+H]+ | Carnitine C12:1 | 1.10 | 0.642 | 0.885 | 0.370 | 1.20 | 0.042 | 0.178 | 1.03 |
| 11.987 | 744.5874 | [M+H]+ | PC O-34:2 | 0.90 | 0.012 | 0.167 | 0.830 | 0.80 | 0.028 | 0.150 | 1.01 |
| 12.049 | 184.07346 | [M]+ | Phosphocholine | 0.90 | 0.452 | 0.784 | 0.440 | 0.80 | 0.030 | 0.150 | 1.06 |
| 12.233 | 570.35406 | [M+H]+ | LPC 22:5 | 0.80 | 0.167 | 0.495 | 0.820 | 0.80 | 0.030 | 0.150 | 1.13 |
| 12.442 | 480.34412 | [M+H]+ | LPC O-16:1 | 0.80 | 0.154 | 0.483 | 1.080 | 0.80 | 0.045 | 0.178 | 1.30 |
| 12.672 | 786.59979 | [M+H]+ | PC 36:2 | 0.80 | 0.020 | 0.186 | 1.110 | 0.80 | 0.004 | 0.056 | 1.17 |
| 12.676 | 760.58594 | [M+H]+ | PC 34:1 | 0.90 | 0.196 | 0.551 | 0.770 | 0.80 | 0.002 | 0.054 | 1.25 |
| 12.696 | 508.37729 | [M+Na]+ | LPC O-18:1 | 0.90 | 0.938 | 0.973 | 0.540 | 0.70 | 0.004 | 0.056 | 1.39 |
| 12.701 | 758.56769 | [M+H]+ | PC 16:0/18:2 | 0.90 | 0.216 | 0.586 | 0.570 | 0.80 | 0.004 | 0.056 | 1.12 |
| 12.887 | 768.58539 | [M+H]+ | PC O-36:4 | 1.10 | 0.816 | 0.931 | 0.280 | 0.70 | 0.043 | 0.178 | 1.19 |
| 13.421 | 784.59369 | [M+H]+ | PC 36:3 | 0.90 | 0.342 | 0.700 | 0.570 | 0.80 | 0.034 | 0.160 | 1.13 |
| 16.96 | 764.52222 | [M+H]+ | PE 38:6 | 0.50 | 0.071 | 0.324 | 2.280 | 0.60 | 0.020 | 0.133 | 1.91 |
| 17.938 | 792.58704 | [M+H]+ | PC O-38:6 | 0.90 | 0.565 | 0.845 | 0.380 | 0.80 | 0.018 | 0.123 | 1.01 |
| 0.842 | 447.06165 | [M+Na-2H]- | Indolylmethyl glucosinolate (IMG) | 0.30 | 0.025 | 0.191 | 2.800 | 0.40 | 0.008 | 0.084 | 2.54 |
| 0.907 | 209.02951 | [M-H]- | Mucic acid | 0.70 | 0.010 | 0.167 | 1.290 | 0.90 | 0.529 | 0.741 | 0.40 |
| 0.963 | 184.98424 | [M+Na-2H]- | 3-Phospho-D-glycerate | 0.50 | 0.008 | 0.167 | 2.280 | 0.70 | 0.165 | 0.387 | 1.45 |
| 1.046 | 173.00806 | [M-H]- | Aconitic acid (Aconitate) | 1.20 | 0.024 | 0.190 | 1.010 | 1.20 | 0.009 | 0.091 | 1.13 |
| 1.048 | 191.01868 | [M-H]- | Citric acid | 1.20 | 0.036 | 0.223 | 0.990 | 1.20 | 0.017 | 0.123 | 1.07 |
| 1.265 | 147.02863 | [M-H]- | Citramalic acid | 0.60 | 0.015 | 0.170 | 1.900 | 0.70 | 0.553 | 0.756 | 1.37 |
| 1.629 | 117.01821 | [M-H]- | Succinic acid (Succinate) | 0.70 | 0.023 | 0.189 | 1.570 | 0.70 | 0.000 | 0.024 | 1.76 |
| 1.872 | 267.07379 | [M-H]- | Inosine | 0.20 | 0.000 | 0.038 | 2.320 | 0.30 | 0.030 | 0.150 | 2.04 |
| 2.675 | 131.03398 | [M-H]- | Glutaric acid | 1.10 | 0.938 | 0.973 | 0.440 | 1.40 | 0.024 | 0.146 | 1.40 |
| 4.655 | 167.02054 | [M-H]- | Uric acid | 1.10 | 0.459 | 0.784 | 0.520 | 5.10 | 0.002 | 0.054 | 3.45 |
| 4.973 | 172.99026 | [M-H]- | Phenol sulphate | 0.60 | 0.000 | 0.005 | 1.870 | 0.50 | 0.000 | 0.000 | 2.33 |
| 5.522 | 214.02727 | [M-H]- | Chlorotyrosine | 0.40 | 0.014 | 0.167 | 2.280 | 0.50 | 0.026 | 0.149 | 2.00 |
| 5.523 | 178.05223 | [M-H]- | Hippuric acid (Hippurate) | 0.40 | 0.008 | 0.167 | 2.270 | 0.50 | 0.007 | 0.082 | 1.96 |
| 5.737 | 212.002 | [M-H]- | 3-Indoxyl sulfate | 0.70 | 0.019 | 0.186 | 1.470 | 0.70 | 0.028 | 0.150 | 1.47 |
| 5.814 | 153.01826 | [M-H]- | Gentisic acid | 1.20 | 0.138 | 0.464 | 0.620 | 1.40 | 0.003 | 0.054 | 1.24 |
| 7.212 | 243.07742 | [M-H]- | Biotin | 0.80 | 0.232 | 0.604 | 0.600 | 0.40 | 0.002 | 0.054 | 2.60 |
| 7.371 | 204.06602 | [M-H]- | Indolelactic acid | 0.80 | 0.160 | 0.483 | 1.000 | 0.50 | 0.000 | 0.011 | 2.30 |
| 7.911 | 137.02327 | [M-H]- | 4-Hydroxybenzoic acid | 0.30 | 0.013 | 0.167 | 2.340 | 0.30 | 0.078 | 0.243 | 2.18 |
| 7.973 | 174.05524 | [M-H]- | Indoleacetic acid (IAA) | 0.70 | 0.089 | 0.354 | 1.270 | 0.70 | 0.003 | 0.056 | 1.12 |
| 7.986 | 197.04501 | [M-H]- | 4-Hydroxy-3-methoxymandelic acid | 4.70 | 0.000 | 0.000 | 4.160 | 3.70 | 0.000 | 0.000 | 3.20 |
| 9.664 | 226.07967 | [M-H]- | 2-Deoxycytidine | 321.30 | 0.005 | 0.151 | 4.070 | 212.00 | 0.181 | 0.416 | 3.14 |
| 9.767 | 378.10141 | [M-H]- | S-Lactoylglutathione | 1.60 | 0.072 | 0.324 | 1.380 | 1.70 | 0.012 | 0.104 | 1.54 |
| 9.883 | 464.30145 | [M-H]- | Glycocholic acid (GCA) | 0.60 | 0.087 | 0.354 | 1.610 | 0.30 | 0.000 | 0.002 | 2.58 |
| 9.938 | 528.26428 | [M-H]- | Glycochenodeoxycholate-3-sulfate (GCDCS) | 0.50 | 0.264 | 0.637 | 2.020 | 1.40 | 0.034 | 0.160 | 1.29 |
| 9.983 | 263.12598 | [M+Na-2H]- | abscisic acid | 1.50 | 0.006 | 0.151 | 1.640 | 1.30 | 0.024 | 0.146 | 1.13 |
| 10.803 | 391.28467 | [M-H]- | Chenodeoxycholic acid (CDCA) | 1.10 | 0.757 | 0.931 | 0.290 | 1.80 | 0.032 | 0.156 | 1.73 |
| 12.298 | 269.24896 | [M-H]- | Heptadecanoic acid | 1.20 | 0.413 | 0.779 | 0.580 | 0.60 | 0.004 | 0.056 | 1.14 |
| 13.818 | 913.58569 | [M-H]- | PI 40:4 | 0.70 | 0.033 | 0.223 | 1.610 | 0.60 | 0.000 | 0.024 | 1.83 |
| 15.951 | 760.56152 | [M-H]- | PC-P 32:1 | 1.30 | 0.037 | 0.223 | 1.230 | 1.30 | 0.017 | 0.123 | 1.22 |
| 16.629 | 786.50946 | [M-H]- | PE 40:8 | 0.50 | 0.050 | 0.253 | 2.160 | 0.60 | 0.026 | 0.149 | 1.87 |
| 16.955 | 788.54657 | [M-H]- | PS 36:1 | 1.30 | 0.016 | 0.170 | 1.170 | 1.20 | 0.117 | 0.312 | 0.71 |
| 17.016 | 738.50635 | [M-H]- | PE 36:4 | 0.70 | 0.081 | 0.343 | 1.700 | 0.60 | 0.001 | 0.047 | 1.76 |
| 18.179 | 740.52344 | [M-H]- | PE 36:3 | 0.70 | 0.274 | 0.642 | 1.450 | 0.60 | 0.012 | 0.104 | 1.65 |
| 18.513 | 911.57239 | [M-H]- | PI 40:5 | 1.20 | 0.013 | 0.167 | 1.020 | 1.10 | 0.016 | 0.123 | 0.88 |
| 18.681 | 816.57391 | [M-H]- | PS 38:1 | 1.20 | 0.014 | 0.167 | 1.040 | 1.10 | 0.381 | 0.623 | 0.49 |

Please use the link below for more details including m/z and peak area of the significant differential metabolites:

https://docs.google.com/spreadsheets/d/1IgIA75wCo79MX6n98pvJ6wCgXy0REilTEnuSOoi_ETg/edit?usp=sharing

**Table S2. The results of spearman correlation analysis between differential metabolites and clinical indices in the HC, RM, and RC samples, respectively.**

| **Metabolites** | **Clinical indices** | **in HC samples** | | **in RC samples** | |  | **Metabolites** | **Clinical indices** | **in HC samples** | | **in RC samples** | |
| --- | --- | --- | --- | --- | --- | --- | --- | --- | --- | --- | --- | --- |
| **p-values** | **Correlation coefficient** | **p-values** | **Correlation coefficient** |  | ***P*-values** | **Correlation coefficient** | ***P*-values** | **Correlation coefficient** |
| Methionine | APTT | 0.0012 | 0.5005 | 0.5975 | 0.0939 |  | ACN 8:0 | APTT | 0.0014 | 0.4949 | 0.1014 | -0.2502 |
| ACN 5:0 | APTT | 0.0041 | 0.4496 | 0.9241 | 0.0170 |  | IMG | APTT | 0.4007 | -0.1384 | 0.0337 | -0.3209 |
| abscisate | FIB | 0.0314 | 0.3451 | 0.2643 | -0.1969 |  | PC 36:3 | APTT | 0.1486 | -0.2357 | 0.0315 | 0.3247 |
| Mucate | FIB | 0.7229 | -0.0586 | 0.0159 | 0.4104 |  | abscisate | FIB | 0.0314 | 0.3451 | 0.7858 | -0.0422 |
| 3-Phospho-glycerate | CRP | 0.1000 | 0.2673 | 0.0384 | 0.3567 |  | ACN 8:0 | FIB | 0.0090 | -0.4126 | 0.6934 | 0.0611 |
| Mucate | CRP | 0.1049 | 0.2636 | 0.0483 | 0.3412 |  | 3-Amino-methylhexanoate | PT | 0.0017 | -0.4856 | 0.7845 | 0.0424 |
| PS 36:1 | CRP | 0.0102 | -0.4068 | 0.5820 | 0.0978 |  | GCA | PT | 0.0200 | 0.3712 | 0.8328 | 0.0328 |
| PS 36:1 | IL_6 | 0.6006 | -0.0877 | 0.0252 | -0.3830 |  | LPC 22:5 | PT | 0.9083 | -0.0191 | 0.0243 | -0.3393 |
| Mucic acid | TNF-α | 0.0043 | 0.4530 | 0.6254 | 0.0868 |  | PC 34:1 | PT | 1.0000 | 0.0000 | 0.0246 | 0.3384 |
| Citramailc acid | TNF-α | 0.0206 | 0.3740 | 0.5979 | -0.0938 |  | ACN 12:1 | CRP | 0.8019 | 0.0415 | 0.0188 | 0.3529 |
| 3-Phosphoglycerate | TNF-α | 0.0229 | 0.3680 | 0.0924 | -0.2932 |  | Choline | CRP | 0.5148 | 0.1075 | 0.0338 | 0.3206 |
| ACN 5:0 | TNF-α | 0.0267 | -0.3590 | 0.8974 | -0.0230 |  | Glutamine | CRP | 0.9337 | 0.0138 | 0.0246 | 0.3385 |
| Methionine | TNF-α | 0.0277 | -0.3570 | 0.7555 | 0.0554 |  | LPC 22:5 | CRP | 0.0819 | -0.2820 | 0.0317 | -0.3244 |
| Succinic acid | TNF-α | 0.0300 | 0.3520 | 0.3951 | -0.1506 |  | LPC O-18:1 | CRP | 0.0046 | -0.4446 | 0.1393 | -0.2265 |
| Cyclic AMP | TNF-α | 0.0377 | 0.3380 | 0.4961 | -0.1208 |  | Phenol-S | CRP | 0.6345 | 0.0786 | 0.0087 | 0.3909 |
| phenol sulfate | TNF-α | 0.2099 | -0.2081 | 0.0291 | -0.3740 |  | Pyroglutamate | CRP | 0.9327 | 0.0140 | 0.0188 | 0.3530 |
| PS 36:1 | CK | 0.8496 | -0.0314 | 0.0004 | -0.5730 |  | Dihydroxymandelate | IL_6 | 0.1403 | 0.2437 | 0.0043 | 0.4230 |
| Mucate | CK-MB | 0.0226 | 0.3643 | 0.0335 | -0.3656 |  | Chlorotyrosine | IL_6 | 0.9943 | 0.0012 | 0.0448 | -0.3040 |
| 3-Phospho-glycerate | α-HBDH | 0.0023 | 0.4736 | 0.9377 | -0.0139 |  | ACN 8:0 | IL_6 | 0.0042 | -0.4540 | 0.2247 | -0.1868 |
| abscisate | α-HBDH | 0.1970 | 0.2111 | 0.0114 | 0.4288 |  | DEET | IL_6 | 0.0095 | -0.4160 | 0.4005 | -0.1300 |
| Cyclic AMP | α-HBDH | 0.0006 | 0.5262 | 0.2198 | 0.2160 |  | IMP | IL_6 | 0.5587 | 0.0979 | 0.0311 | -0.3250 |
| Methionine | α-HBDH | 0.0027 | -0.4667 | 0.9439 | -0.0125 |  | Methoxyindoleacetic acid | IL_6 | 0.7639 | -0.0504 | 0.0157 | 0.3620 |
| Mucate | α-HBDH | 0.0081 | 0.4178 | 0.2463 | -0.2044 |  | PC 36:3 | IL_6 | 0.0087 | 0.4200 | 0.3890 | -0.1331 |
| Phenol-S | α-HBDH | 0.8256 | -0.0365 | 0.0293 | -0.3742 |  | Serine | IL_6 | 0.0372 | 0.3390 | 0.5244 | 0.0986 |
| Taurine | α-HBDH | 0.0291 | 0.3497 | 0.0276 | -0.3778 |  | Choline | TNF-α | 0.1358 | 0.2464 | 0.0084 | 0.3930 |
| ACN 5:0 | α-HBDH | 0.0008 | -0.5153 | 0.9104 | -0.0200 |  | Cyclic AMP | TNF-α | 0.0377 | 0.3380 | 0.5290 | 0.0975 |
| Hydroxybenzoate | BUN | 0.3617 | 0.1501 | 0.0376 | -0.3580 |  | PE 36:3 | TNF-α | 0.0716 | 0.2956 | 0.0375 | 0.3150 |
| ACN 5:0 | UA | 0.0048 | 0.4428 | 0.3755 | 0.1569 |  | PE 36:4 | TNF-α | 0.0908 | 0.2782 | 0.0025 | 0.4440 |
| Hydroxybenzoate | eGFR | 0.0150 | 0.3870 | 0.3372 | 0.1697 |  | PE 38:6 | TNF-α | 0.0318 | 0.3490 | 0.6884 | 0.0622 |
| IMP | eGFR | 0.0910 | -0.2743 | 0.0090 | -0.4410 |  | PE 40:8 | TNF-α | 0.0283 | 0.3560 | 0.7039 | 0.0589 |
| Cyclic AMP | eGFR | 0.2082 | -0.2061 | 0.0117 | -0.4270 |  | Succinic acid | TNF-α | 0.0300 | 0.3520 | 0.7432 | -0.0508 |
| 2'-Deoxycytidine | eGFR | 0.9678 | -0.0067 | 0.0312 | -0.3700 |  | Arginine | CK | 0.0078 | -0.4195 | 0.1439 | 0.2239 |
| Aconitate | ALT | 0.9329 | 0.0141 | 0.0025 | 0.5010 |  | ACN 12:1 | CK | 0.7943 | -0.0431 | 0.0437 | 0.3055 |
| ACN 5:0 | ALT | 0.8544 | 0.0308 | 0.0224 | 0.3906 |  | MIAA | CK | 0.0147 | -0.3877 | 0.0380 | 0.3139 |
| Aconitate | AST | 0.9739 | 0.0055 | 0.0346 | 0.3635 |  | PC O-34:2 | CK | 0.0292 | 0.3496 | 0.3734 | -0.1375 |
| Methionine | AST | 0.0343 | -0.3443 | 0.4621 | 0.1305 |  | PC 34:1 | CK | 0.0179 | 0.3772 | 0.2950 | -0.1615 |
| Mucate | AST | 0.0431 | 0.3299 | 0.6925 | -0.0704 |  | PC-P 32:1 | CK | 0.1908 | 0.2140 | 0.0229 | -0.3425 |
| ACN 5:0 | AST | 0.0499 | -0.3204 | 0.0284 | 0.3761 |  | PE 38:6 | CK | 0.0042 | 0.4487 | 0.9631 | 0.0072 |
| 3-Phospho-glycerate | LDH | 0.0150 | 0.3867 | 0.5236 | 0.1133 |  | PE 40:8 | CK | 0.0311 | 0.3457 | 0.6259 | 0.0756 |
| abscisate | LDH | 0.4121 | 0.1351 | 0.0327 | 0.3672 |  | PI 40:4 | CK | 0.0061 | 0.4312 | 0.1199 | -0.2379 |
| Cyclic AMP | LDH | 0.0096 | 0.4096 | 0.0898 | 0.2955 |  | Riboflavin | CK | 0.0144 | -0.3888 | 0.4074 | -0.1281 |
| Methionine | LDH | 0.0028 | -0.4651 | 0.5304 | 0.1114 |  | Lactoylglutathione | CK | 0.5304 | 0.1036 | 0.0190 | 0.3523 |
| Mucate | LDH | 0.0007 | 0.5218 | 0.5062 | -0.1180 |  | 2-Methylindole | CK-MB | 0.9233 | 0.0159 | 0.0017 | 0.4594 |
| Phenol-S | LDH | 0.7171 | -0.0599 | 0.0330 | -0.3666 |  | Chlorotyrosine | CK-MB | 0.5865 | -0.0899 | 0.0134 | 0.3702 |
| ACN 5:0 | LDH | 0.0011 | -0.5029 | 0.6556 | 0.0793 |  | ACN 12:1 | CK-MB | 0.0261 | -0.3562 | 0.1514 | 0.2199 |
| PI 40:5 | lPCV% | 0.5388 | -0.1263 | 0.0312 | -0.3757 |  | GCA | CK-MB | 0.2371 | -0.1938 | 0.0028 | 0.4399 |
| IMP | lPCV% | 0.0163 | 0.4664 | 0.7428 | -0.0594 |  | Hippurate | CK-MB | 0.5826 | -0.0908 | 0.0052 | 0.4144 |
| IMP | lPGV% | 0.0163 | 0.4664 | 0.8815 | 0.0270 |  | Indoleacetate | CK-MB | 0.1899 | -0.2144 | 0.0238 | 0.3403 |
| IMP | lPLV% | 0.0163 | 0.4664 | 0.9769 | 0.0052 |  | Phosphocholine | CK-MB | 0.0256 | -0.3571 | 0.8149 | -0.0363 |
| IMP | PCV% | 0.0163 | 0.4664 | 0.7845 | 0.0495 |  | ACN 8:0 | α-HBDH | 0.0073 | -0.4227 | 0.9117 | 0.0172 |
| IMP | PGV% | 0.0206 | 0.4516 | 0.3421 | 0.1707 |  | Cyclic AMP | α-HBDH | 0.0006 | 0.5262 | 0.0003 | 0.5199 |
| IMP | PLV% | 0.0286 | 0.4295 | 0.3586 | 0.1651 |  | HMMA | α-HBDH | 0.4353 | 0.1286 | 0.0376 | 0.3145 |
|  |  |  |  |  |  |  | Hypoxanthine | α-HBDH | 0.0716 | 0.2917 | 0.0176 | -0.3564 |
|  |  |  |  |  |  |  | Indoleacetate | α-HBDH | 0.0164 | -0.3819 | 0.3528 | 0.1435 |
|  |  |  |  |  |  |  | Inosine | α-HBDH | 0.1078 | 0.2615 | 0.0324 | -0.3231 |
|  |  |  |  |  |  |  | PC O-36:4 | α-HBDH | 0.0273 | 0.3534 | 0.5230 | -0.0989 |
|  |  |  |  |  |  |  | Succinate | α-HBDH | 0.0223 | 0.3650 | 0.1173 | 0.2395 |
|  |  |  |  |  |  |  | Taurine | α-HBDH | 0.0291 | 0.3497 | 0.6719 | -0.0657 |
|  |  |  |  |  |  |  | 2-Methylindole | BUN | 0.0435 | 0.3249 | 0.1936 | -0.1997 |
|  |  |  |  |  |  |  | abscisate | BUN | 0.0211 | 0.3682 | 0.1060 | 0.2470 |
|  |  |  |  |  |  |  | ACN 8:0 | BUN | 0.2908 | -0.1735 | 0.0208 | 0.3477 |
|  |  |  |  |  |  |  | PC O-38:6 | BUN | 0.5353 | 0.1023 | 0.0456 | 0.3030 |
|  |  |  |  |  |  |  | ACN 8:0 | eGFR | 0.8228 | -0.0370 | 0.0037 | -0.4280 |
|  |  |  |  |  |  |  | cis-Aconitic acid | eGFR | 0.5301 | -0.1036 | 0.0424 | -0.3070 |
|  |  |  |  |  |  |  | Citric acid | eGFR | 0.4047 | -0.1372 | 0.0499 | -0.2970 |
|  |  |  |  |  |  |  | Cyclic AMP | eGFR | 0.2082 | -0.2061 | 0.0156 | -0.3620 |
|  |  |  |  |  |  |  | IMP | eGFR | 0.0910 | -0.2743 | 0.0418 | -0.3080 |
|  |  |  |  |  |  |  | uric acid | eGFR | 0.0036 | -0.4550 | 0.4424 | -0.1188 |
|  |  |  |  |  |  |  | ACN 12:1 | UA | 0.8352 | 0.0344 | 0.0035 | 0.4310 |
|  |  |  |  |  |  |  | ACN 8:0 | UA | 0.0006 | 0.5266 | 0.0638 | 0.2819 |
|  |  |  |  |  |  |  | Choline | UA | 0.7020 | -0.0633 | 0.0275 | 0.3323 |
|  |  |  |  |  |  |  | Aconitate | UA | 0.8631 | -0.0285 | 0.0161 | 0.3610 |
|  |  |  |  |  |  |  | Citric acid | UA | 0.3763 | 0.1457 | 0.0305 | 0.3266 |
|  |  |  |  |  |  |  | Cyclic AMP | UA | 0.5683 | -0.0942 | 0.0274 | 0.3325 |
|  |  |  |  |  |  |  | GCA | UA | 0.0025 | -0.4713 | 0.5354 | -0.0960 |
|  |  |  |  |  |  |  | Glutamine | UA | 0.1015 | -0.2661 | 0.0371 | 0.3153 |
|  |  |  |  |  |  |  | MIAA | UA | 0.4920 | -0.1134 | 0.0066 | 0.4035 |
|  |  |  |  |  |  |  | PC O-34:2 | UA | 0.0322 | 0.3436 | 0.3074 | 0.1574 |
|  |  |  |  |  |  |  | PC-P 32:1 | UA | 0.2729 | -0.1800 | 0.0266 | -0.3342 |
|  |  |  |  |  |  |  | PE 38:6 | UA | 0.5829 | 0.0907 | 0.0187 | -0.3532 |
|  |  |  |  |  |  |  | PI 40:4 | UA | 0.0407 | 0.3293 | 0.9812 | -0.0037 |
|  |  |  |  |  |  |  | Pyroglutamate | UA | 0.1135 | -0.2575 | 0.0205 | 0.3483 |
|  |  |  |  |  |  |  | Ribitol | UA | 0.4033 | -0.1377 | 0.0005 | 0.5019 |
|  |  |  |  |  |  |  | Succinate | UA | 0.0280 | -0.3519 | 0.2777 | 0.1673 |
|  |  |  |  |  |  |  | uric acid | UA | 0.0233 | 0.3627 | 0.0003 | 0.5157 |
|  |  |  |  |  |  |  | 2-Methylindole | ALT | 0.0213 | -0.3724 | 0.2529 | 0.1761 |
|  |  |  |  |  |  |  | Indoxyl-S | ALT | 0.0061 | -0.4373 | 0.5950 | -0.0824 |
|  |  |  |  |  |  |  | abscisate | ALT | 0.0156 | -0.3896 | 0.4340 | 0.1210 |
|  |  |  |  |  |  |  | GCA | ALT | 0.0095 | -0.4153 | 0.8642 | 0.0265 |
|  |  |  |  |  |  |  | Indoleacetate | ALT | 0.0082 | -0.4226 | 0.7178 | -0.0561 |
|  |  |  |  |  |  |  | Indolelactate | ALT | 0.0266 | -0.3596 | 0.9695 | -0.0059 |
|  |  |  |  |  |  |  | LPC O-18:1 | ALT | 0.6234 | 0.0823 | 0.0310 | -0.3257 |
|  |  |  |  |  |  |  | PC 36:3 | ALT | 0.0364 | 0.3406 | 0.3141 | -0.1553 |
|  |  |  |  |  |  |  | PC 34:1 | ALT | 0.0398 | 0.3350 | 0.7768 | -0.0440 |
|  |  |  |  |  |  |  | 3-Amino-methylhexanoate | AST | 0.0257 | 0.3617 | 0.1436 | 0.2241 |
|  |  |  |  |  |  |  | Indoxyl-S | AST | 0.0205 | -0.3747 | 0.9257 | -0.0145 |
|  |  |  |  |  |  |  | Arginine | AST | 0.1647 | -0.2301 | 0.0361 | 0.3169 |
|  |  |  |  |  |  |  | GCA | AST | 0.0071 | -0.4295 | 0.2625 | 0.1726 |
|  |  |  |  |  |  |  | Indoleacetate | AST | 0.0063 | -0.4357 | 0.7058 | 0.0586 |
|  |  |  |  |  |  |  | PC O-36:4 | AST | 0.0007 | 0.5239 | 0.4498 | 0.1169 |
|  |  |  |  |  |  |  | PC 34:1 | AST | 0.0396 | 0.3353 | 0.9488 | 0.0100 |
|  |  |  |  |  |  |  | PE 38:6 | AST | 0.0256 | 0.3619 | 0.4143 | -0.1262 |
|  |  |  |  |  |  |  | Ribitol | AST | 0.3614 | -0.1523 | 0.0270 | 0.3334 |
|  |  |  |  |  |  |  | ACN 8:0 | LDH | 0.0233 | -0.3627 | 0.4094 | -0.1275 |
|  |  |  |  |  |  |  | Cyclic AMP | LDH | 0.0096 | 0.4096 | 0.0010 | 0.4793 |
|  |  |  |  |  |  |  | GCA | LDH | 0.0398 | -0.3306 | 0.8790 | 0.0236 |
|  |  |  |  |  |  |  | Hypoxanthine | LDH | 0.0780 | 0.2856 | 0.0274 | -0.3327 |
|  |  |  |  |  |  |  | Indoleacetate | LDH | 0.0042 | -0.4481 | 0.5216 | 0.0992 |
|  |  |  |  |  |  |  | MIAA | LDH | 0.0121 | -0.3980 | 0.4655 | 0.1129 |
|  |  |  |  |  |  |  | PC 36:3 | LDH | 0.0379 | 0.3336 | 0.6570 | 0.0688 |
|  |  |  |  |  |  |  | PE 38:6 | LDH | 0.0362 | 0.3365 | 0.3373 | -0.1481 |
|  |  |  |  |  |  |  | Taurine | LDH | 0.0328 | 0.3425 | 0.7024 | -0.0593 |
|  |  |  |  |  |  |  | Cyclic AMP | lPCV% | 0.1579 | -0.2852 | 0.0303 | 0.3472 |
|  |  |  |  |  |  |  | Indolelactate | lPCV% | 0.0962 | 0.3333 | 0.0230 | 0.3633 |
|  |  |  |  |  |  |  | MIAA | lPCV% | 0.0886 | 0.3406 | 0.0490 | 0.3174 |
|  |  |  |  |  |  |  | Lactoylglutathione | lPCV% | 0.4150 | 0.1669 | 0.0148 | -0.3874 |
|  |  |  |  |  |  |  | Cyclic AMP | lPGV% | 0.1579 | -0.2852 | 0.0041 | 0.4492 |
|  |  |  |  |  |  |  | LPC O-18:1 | lPGV% | 0.2668 | 0.2261 | 0.0195 | 0.3725 |
|  |  |  |  |  |  |  | PC 36:3 | lPGV% | 0.4399 | 0.1583 | 0.0404 | 0.3296 |
|  |  |  |  |  |  |  | PC 34:1 | lPGV% | 0.6952 | 0.0807 | 0.0390 | 0.3319 |
|  |  |  |  |  |  |  | Ribitol | lPGV% | 0.1857 | -0.2680 | 0.0290 | -0.3499 |
|  |  |  |  |  |  |  | Lactoylglutathione | lPGV% | 0.4150 | 0.1669 | 0.0388 | -0.3322 |
|  |  |  |  |  |  |  | Cyclic AMP | lPLV% | 0.1579 | -0.2852 | 0.0033 | 0.4594 |
|  |  |  |  |  |  |  | LPC O-18:1 | lPLV% | 0.2668 | 0.2261 | 0.0161 | 0.3832 |
|  |  |  |  |  |  |  | PC 36:3 | lPLV% | 0.4399 | 0.1583 | 0.0416 | 0.3279 |
|  |  |  |  |  |  |  | PC 34:1 | lPLV% | 0.6952 | 0.0807 | 0.0379 | 0.3336 |
|  |  |  |  |  |  |  | Ribitol | lPLV% | 0.1857 | -0.2680 | 0.0256 | -0.3572 |
|  |  |  |  |  |  |  | Lactoylglutathione | lPLV% | 0.4150 | 0.1669 | 0.0374 | -0.3345 |
|  |  |  |  |  |  |  | ACN 8:0 | PCV% | 0.6819 | -0.0844 | 0.0340 | 0.3404 |
|  |  |  |  |  |  |  | Indolelactate | PCV% | 0.0962 | 0.3333 | 0.0481 | 0.3185 |
|  |  |  |  |  |  |  | Cyclic AMP | PGV% | 0.7581 | -0.0634 | 0.0119 | 0.3990 |
|  |  |  |  |  |  |  | Indolelactate | PGV% | 0.2286 | 0.2445 | 0.0409 | 0.3289 |
|  |  |  |  |  |  |  | LPC O-18:1 | PGV% | 0.0335 | 0.4183 | 0.4856 | 0.1150 |
|  |  |  |  |  |  |  | ACN 8:0 | PLV% | 0.8186 | -0.0473 | 0.0425 | 0.3265 |
|  |  |  |  |  |  |  | Cyclic AMP | PLV% | 0.8564 | -0.0373 | 0.0085 | 0.4154 |
|  |  |  |  |  |  |  | Indolelactate | PLV% | 0.2928 | 0.2144 | 0.0373 | 0.3347 |
|  |  |  |  |  |  |  | Ribitol | PLV% | 0.0154 | -0.4702 | 0.7112 | -0.0612 |
|  |  |  |  |  |  |  | ACN 8:0 | rPCV% | 0.7249 | -0.0725 | 0.0216 | 0.3667 |
|  |  |  |  |  |  |  | Indoleacetyl-asp | rPCV% | 0.0400 | 0.4053 | 0.3399 | 0.1570 |
|  |  |  |  |  |  |  | Indolelactate | rPCV% | 0.1048 | 0.3254 | 0.0152 | 0.3860 |
|  |  |  |  |  |  |  | Lactoylglutathione | rPCV% | 0.0392 | 0.4068 | 0.6494 | -0.0751 |
|  |  |  |  |  |  |  | ACN 8:0 | rPGV% | 0.4037 | -0.1710 | 0.0143 | 0.3892 |
|  |  |  |  |  |  |  | Citric acid | rPGV% | 0.1206 | -0.3121 | 0.0291 | 0.3496 |
|  |  |  |  |  |  |  | Hypoxanthine | rPGV% | 0.0434 | 0.3991 | 0.3727 | -0.1467 |
|  |  |  |  |  |  |  | Indolelactate | rPGV% | 0.2732 | 0.2232 | 0.0151 | 0.3864 |
|  |  |  |  |  |  |  | Inosine | rPGV% | 0.0494 | 0.3892 | 0.4146 | -0.1344 |
|  |  |  |  |  |  |  | Ribitol | rPGV% | 0.0055 | -0.5288 | 0.7724 | 0.0478 |
|  |  |  |  |  |  |  | ACN 8:0 | rPLV% | 0.4037 | -0.1710 | 0.0141 | 0.3902 |
|  |  |  |  |  |  |  | Citric acid | rPLV% | 0.1206 | -0.3121 | 0.0287 | 0.3505 |
|  |  |  |  |  |  |  | Hypoxanthine | rPLV% | 0.0434 | 0.3991 | 0.3367 | -0.1580 |
|  |  |  |  |  |  |  | Indolelactate | rPLV% | 0.2732 | 0.2232 | 0.0126 | 0.3960 |
|  |  |  |  |  |  |  | Inosine | rPLV% | 0.0494 | 0.3892 | 0.3807 | -0.1443 |
|  |  |  |  |  |  |  | Ribitol | rPLV% | 0.0055 | -0.5288 | 0.7550 | 0.0516 |

**Supplementary Figure**

**Supplementary Figure 1**

PLS-DA (A) and PCA plots (B-G) based on the metabolites detected in plasma samples of RAs, RMs, RCs, and HCs. (F) PCA plots for variables between PC1 and PC2, (G) The proportion of variance explained by each of the first 5 principal components in PCA analysis.

**
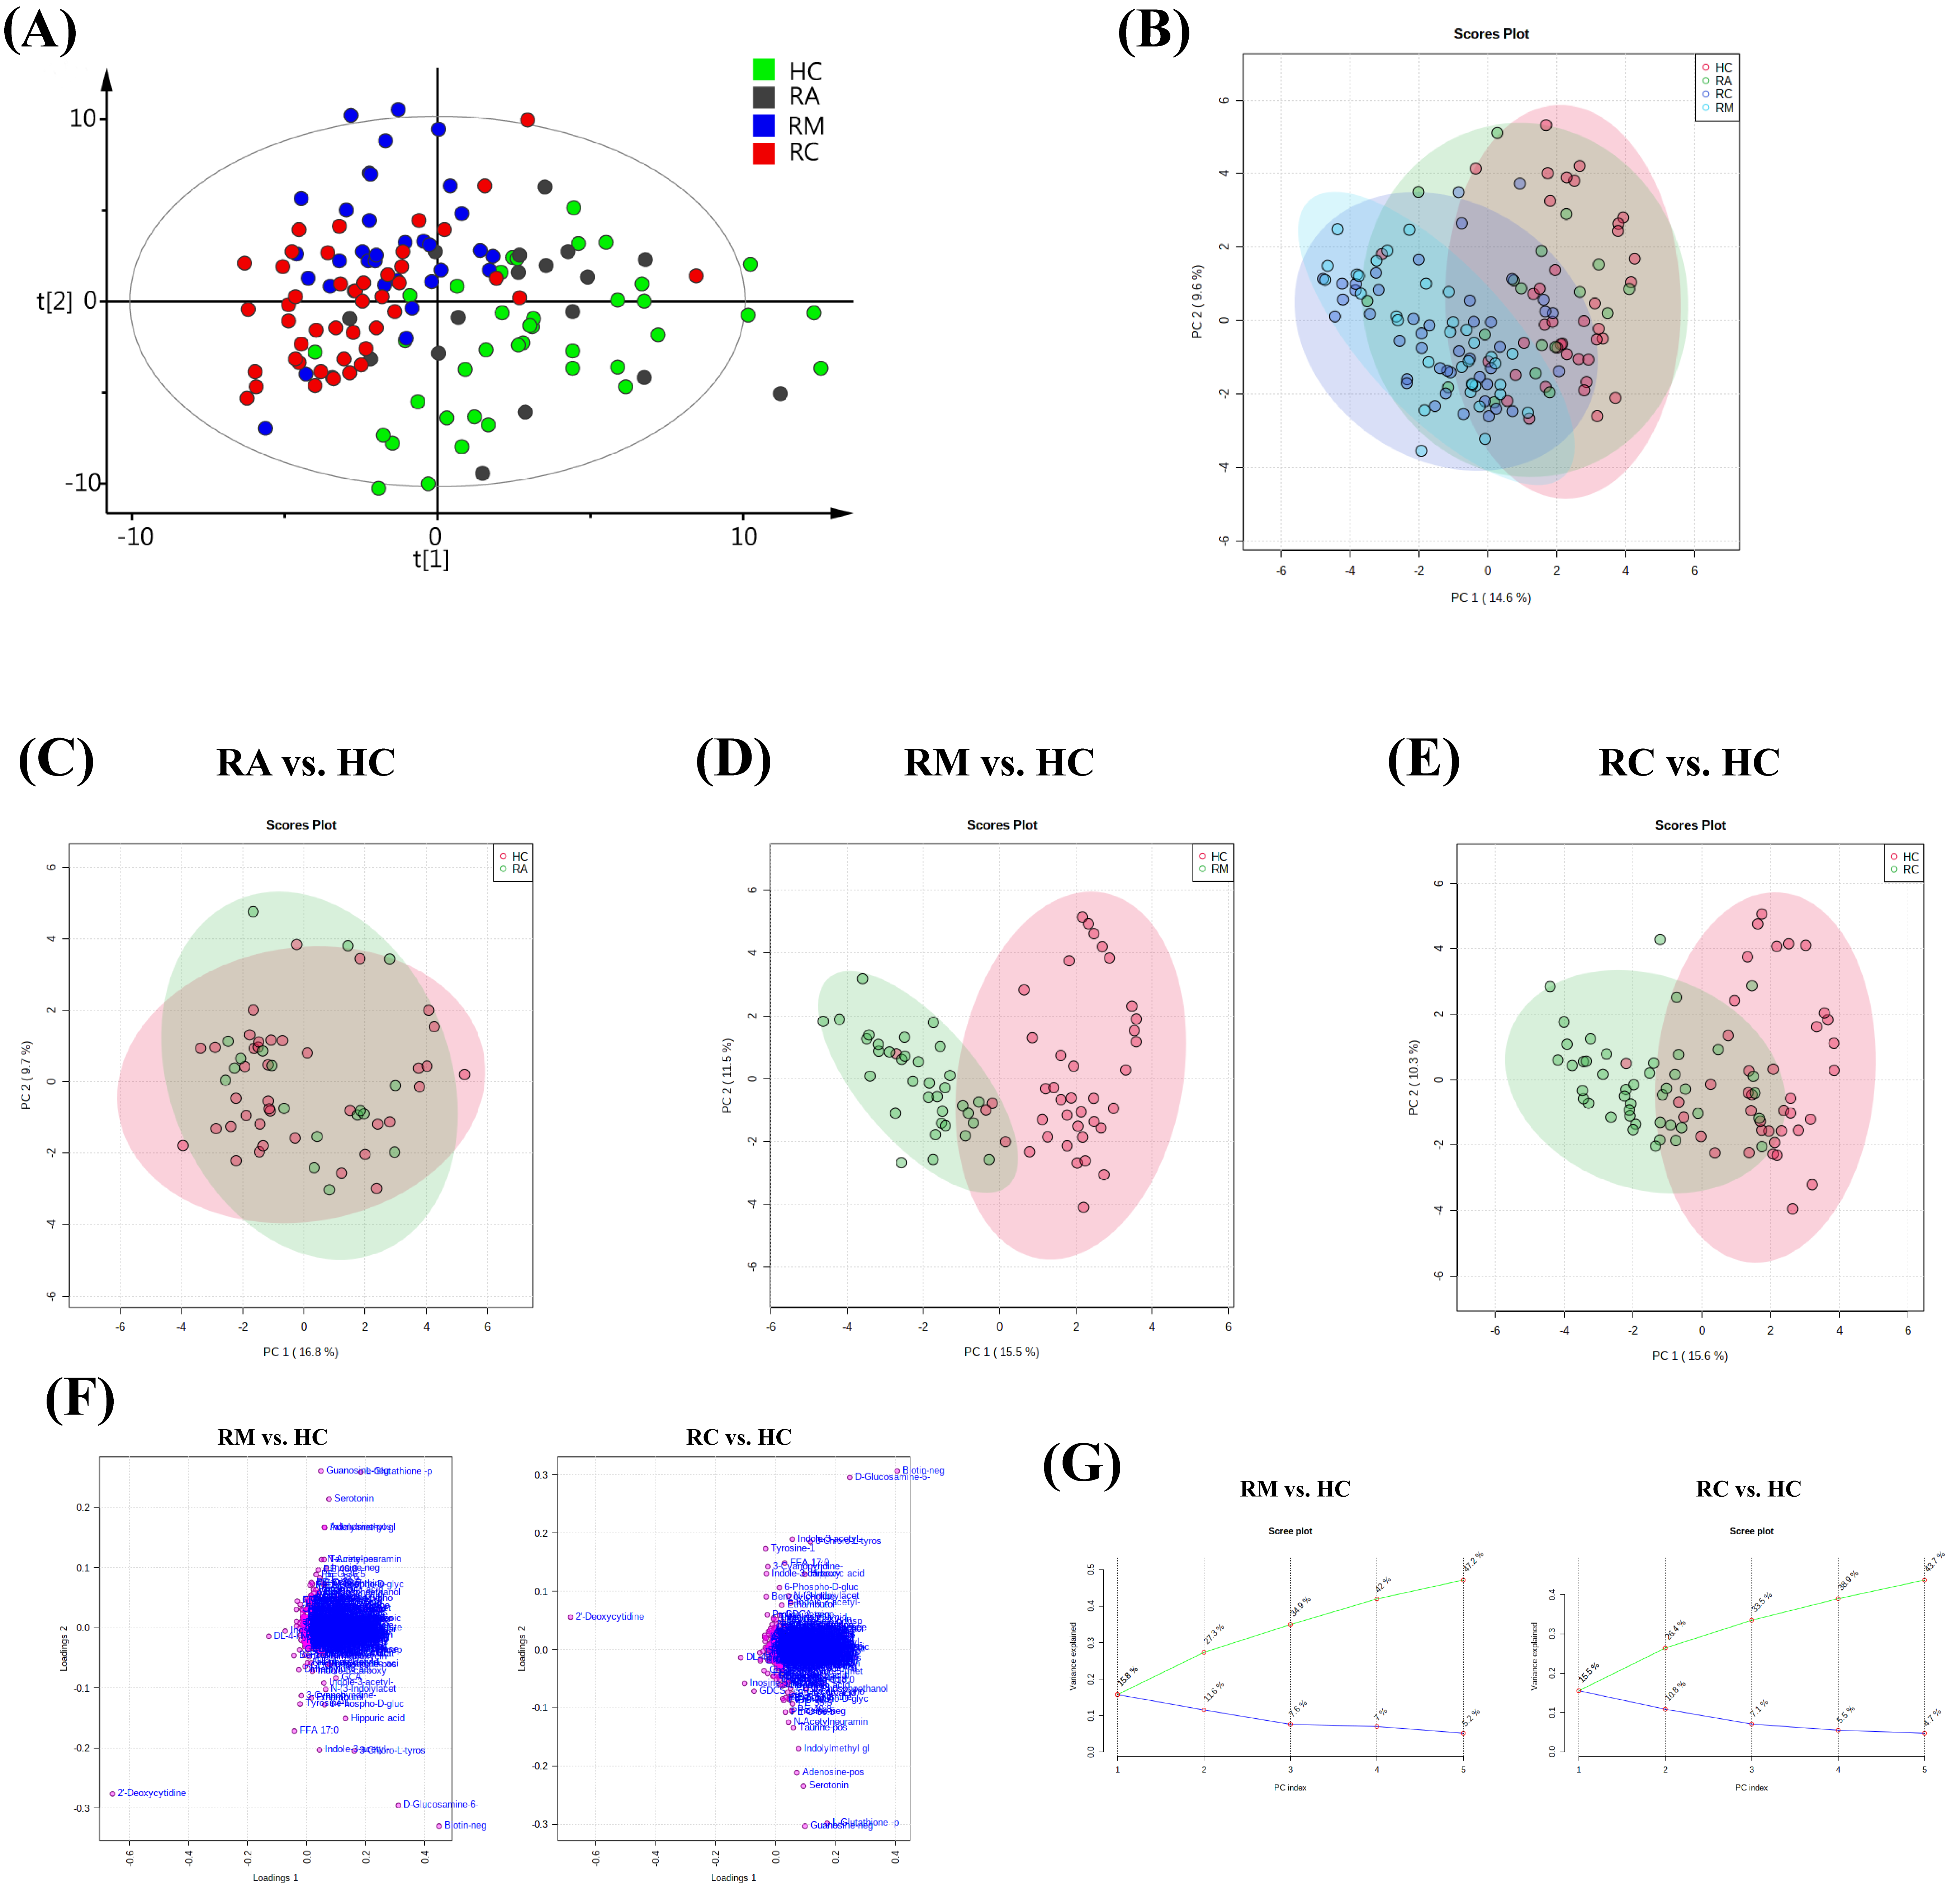
**

**Supplementary Figure 2**

Scatter plots of some significantly altered metabolites in RMs and RCs compared with HCs. Six representative differential metabolites in this study (A), and another cohort study20 (B). Data were expressed as median (interquartile range), Man-Whitney U test was performed to compare the differences between RMs and HCs, and RCs and HCs.

**
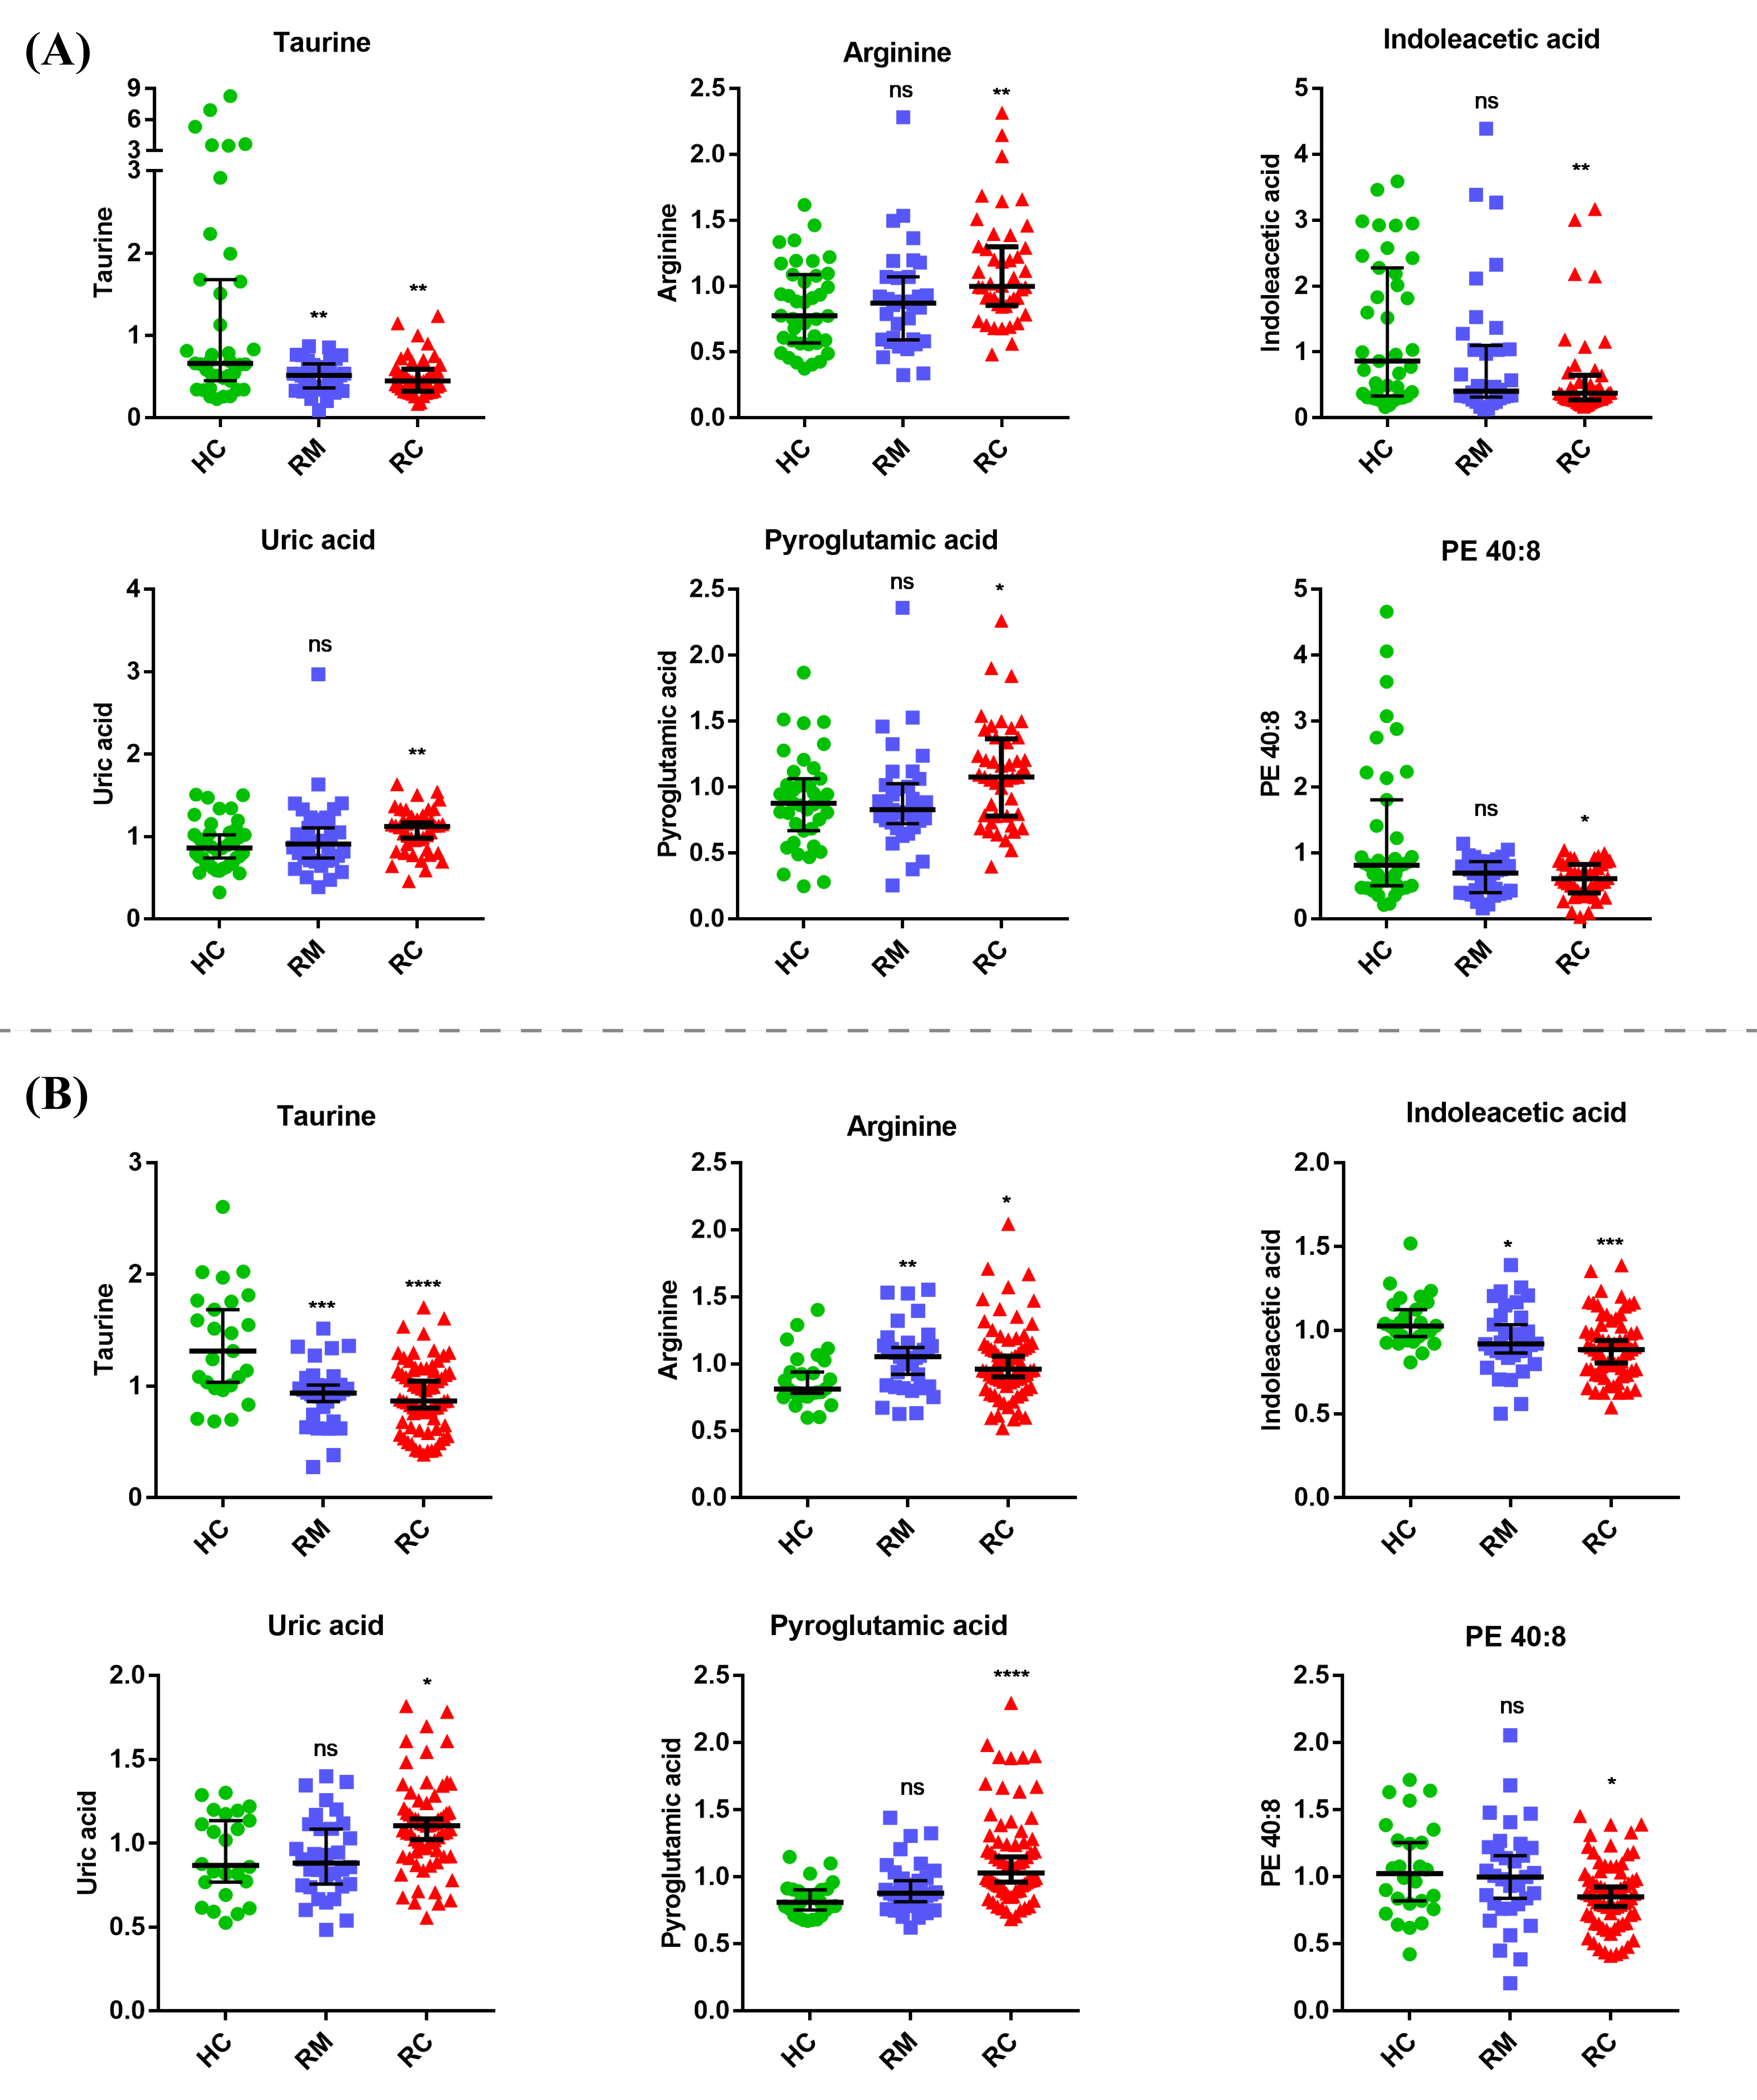
**
